# Supplementary material for: Metal–organic framework derived low-crystallinity cobalt–nitrogen–carbon electrocatalysts for nitrate reduction to ammonia
Source: Royal Society of Chemistry journal article supplement (doi:10.1039/d4ta05443a), 2024-01-01
Supplement: d4ta05443a1.pdf [file d4ta05443a1.pdf]

## **Supporting Information**

### **Metal organic framework derived low-crystallized cobalt-nitrogen-carbon electrocatalysts for nitrate reduction to ammonia**

Yue Cao, Shengbo Yuan, Wenbo Zhou, Yan Hai, Xiaoman Li, \* and Min Luo\*

State Key Laboratory of High-efficiency Utilization of Coal and Green Chemical Engineering, School of Chemistry and Chemical Engineering, Ningxia University, Yinchuan, Ningxia 750021, P. R. China

**E-mail:** luominjy@nxu.edu.cn, lixm2017@nxu.edu.cn

# Contents

|                                                                                                                                                                                                                                                                                                                                         |    |
|-----------------------------------------------------------------------------------------------------------------------------------------------------------------------------------------------------------------------------------------------------------------------------------------------------------------------------------------|----|
| 1. <b>Figure S 1.</b> (a) UV-Vis absorption curves of $\text{NO}_3^-$ -N. (b) Calibration curve used to estimate the concentrations of $\text{NO}_3^-$ -N. ....                                                                                                                                                                         | 3  |
| 2. <b>Figure S 2.</b> (a) UV-Vis absorption curves of $\text{NO}_2^-$ -N. (b) Calibration curve used to estimate the concentrations of $\text{NO}_2^-$ -N. ....                                                                                                                                                                         | 4  |
| 3. <b>Figure S 3.</b> (a) UV-Vis curves of various concentrations of $\text{N}_2\text{H}_4$ stained with $\text{C}_9\text{H}_{11}\text{NO}$ indicator. (b) A calibration curve used to estimate the concentrations of $\text{N}_2\text{H}_4$ . ....                                                                                     | 5  |
| 4. <b>Figure S 4.</b> (a) UV-Vis absorption curves of Nessler's reagent assays kept with different concentrations of $\text{NH}_4^+$ -N. (b) Calibration curve used to estimate the concentrations of $\text{NH}_4^+$ -N. ....                                                                                                          | 6  |
| 5. <b>Figure S 5.</b> The $\text{NH}_4^+$ detection of (a) standard spectra and (b) fitting curve by ion chromatography.....                                                                                                                                                                                                            | 7  |
| 6. <b>Figure S 6.</b> The XRD patterns of the Co-MOF precursor.....                                                                                                                                                                                                                                                                     | 9  |
| 7. <b>Figure S 7.</b> The XRD patterns of the Co-N-C-500, Co-N-C-600, Co-N-C-700, and Z-Co-N-C-900.....                                                                                                                                                                                                                                 | 9  |
| 8. <b>Figure S 8.</b> The XRD patterns of the Co-N-C-400, Co-N-C-500, Co-N-C-600, Co-N-C-700, Co-N-C-800, and Co-N-C-900.....                                                                                                                                                                                                           | 9  |
| 9. <b>Figure S 9.</b> XPS spectra survey scan of (a) $\text{Co}_3\text{O}_4$ , (b) Co-N-C-500, (c) Co-N-C-600, and (d) Co-N-C-700. ....                                                                                                                                                                                                 | 10 |
| 10. <b>Figure S 10.</b> XPS spectra survey scan of Co-N-C-500 after immersing.....                                                                                                                                                                                                                                                      | 10 |
| 11. <b>Figure S 11.</b> EPR spectra of $\text{Co}_3\text{O}_4$ .....                                                                                                                                                                                                                                                                    | 11 |
| 12. <b>Figure S 12.</b> (a) The TEM images and particle size distribution statistics (inset) of the Co-N-C-500. (b) The TEM images and particle size distribution statistics (inset) of the Co-N-C-700. ....                                                                                                                            | 12 |
| 13. <b>Figure S 13.</b> (a) The TEM images and particle size distribution statistics (inset) of the Z-Co-N-C-900. (b) STEM and the element mapping images of Z-Co-N-C-900. ....                                                                                                                                                         | 12 |
| 14. <b>Figure S 14.</b> LSV curves of $\text{Co}_3\text{O}_4$ , Co-N-C-500, Co-N-C-600, and Co-N-C-700 in 0.05 M $\text{K}_2\text{SO}_4$ with and without 0.05 M $\text{NO}_3^-$ .....                                                                                                                                                  | 13 |
| 15. <b>Figure S 15.</b> (a) $\text{NO}_2^-$ yield rate and FE, (b) $\text{N}_2\text{H}_4$ absorbance, (c) $\text{NH}_3$ yield rate and FE, and (d) FE of $\text{NH}_3$ , $\text{NO}_2^-$ , $\text{H}_2$ , and other by-products of Co-N-C-500 at various potentials in 0.05 M $\text{K}_2\text{SO}_4$ with 0.01 M $\text{NO}_3^-$ ..... | 14 |
| 16. <b>Figure S 16.</b> XPS spectra survey scan of (a) Co-N-C-500-30h-after. The high-resolution XPS spectra of the Co-N-C-500 and Co-N-C-500-30h-after: (b) Co 2p, (c) C 1s, (d) N 1s, and (e) O 1s. ....                                                                                                                              | 15 |
| 17. <b>Figure S 17.</b> CV curves of (a) $\text{Co}_3\text{O}_4$ , (b) Co-N-C-500, (c) Co-N-C-600, and (d) Co-N-C-700. ....                                                                                                                                                                                                             | 16 |
| 18. <b>Figure S 18.</b> Electrochemical impedance spectroscopy plot of the $\text{Co}_3\text{O}_4$ , (b) Co-N-C-500, (c) Co-N-C-600, and Co-N-C-700.....                                                                                                                                                                                | 17 |
| 19. <b>Figure S 19.</b> (a) The XRD patterns of Co-N-C-700 and immersion-1h of Co-N-C-700.....                                                                                                                                                                                                                                          | 18 |
| 20. <b>Table S 1.</b> The comparison of electrocatalytic NRA performance of Co-N-C-500 with other reported catalysts.....                                                                                                                                                                                                               | 19 |

## Experimental Section

**Materials:** The ethanol was purchased from Energy chemical. The potassium sulphate ( $K_2SO_4$ , 98%) and sodium nitrate- $^{15}N$  ( $Na^{15}NO_3$ , abundance of elements 99%) were bought from Shanghai Aladdin Ltd. The source of  $Co(NO_3)_2 \cdot 6H_2O$  and potassium nitrate ( $KNO_3$ , 98%) was Sinopharm chemical reagent Co., ltd. The sodium nitrate ( $NaNO_3$ , 99%) was purchased from damao chemical reagent factory. The 2-methylimidazole ( $C_4H_6N_2$ ) was bought from Shanghai Aladdin Ltd.. The sodium sulphate ( $Na_2SO_4$ , 99%) was obtained from 3A Materials. All chemicals were applied without further purification.

**Synthesis of samples:** 0.656 g 2-methylimidazole ( $C_4H_6N_2$ ) and 0.2911 g  $Co(NO_3)_2 \cdot 6H_2O$  were dissolved in 20 mL deionized water, respectively. The two solutions were then mixed under a rapid stirring. A piece of copper foam ( $1 \times 1.5 \text{ cm}^2$ ) cleaned with acetone, ethanol and water was placed in the mixture for 12 hours at room temperature to obtain Co-MOF. The Co-MOF was calcined at 500, 600, and 700 °C for 3 hours in a nitrogen atmosphere with a ramp rate of  $4 \text{ }^\circ\text{C min}^{-1}$ , and the samples obtained were denoted as Co-N-C-500, Co-N-C-600, and Co-N-C-700, respectively. The  $Co_3O_4$  was prepared under the same conditions as the preparation Co-N-C-500, except in an air atmosphere. The synthesis method of Zn-Co-MOF is consistent with that of Co-MOF. Only the raw material quantity is modified to 2.62 g 2-methylimidazole ( $C_4H_6N_2$ ), 0.15 g  $Co(NO_3)_2 \cdot 6H_2O$  and 1.34 g  $Zn(NO_3)_2 \cdot 6H_2O$  and modify the amount of deionized water to 40 mL. The Zn-Co-MOF precursor was subjected to calcination at 900 °C in  $N_2$  atmosphere, other conditions are consistent with the Co-N-C-500, and the resulting sample was designated as Z-Co-N-C-900.

## Characterizations

X-ray diffraction (XRD) patterns were obtained on AXS D8ADVANCE A25 (Bruker, Germany) equipped with  $Cu-K\alpha$  radiation. Scanning electron microscope (SEM) images were acquired by sigma 300 (Zeiss, Germany) cold field emission scanning electron microscope. X-ray photoelectron spectroscopy (XPS) was collected on ESCALAB Xi+. The absorbance was tested on a PERSEE TU-1901 dual-beam UV-vis spectrophotometer. The electrochemical workstation uses the CHI 660D (Shanghai CH Instruments, P. R. China). The *in-situ* attenuated total reflection Fourier-transformed infrared spectroscopy (ATR-FTIR) uses the Nicolet iS20 (Thermo Fisher

Scientific, USA) and photoelectrochemistry *in-situ* attenuated total reflection infrared reaction cell (EC-ATR-H, Beijing Scistar Technology Co. Ltd.). The transmission electron microscopy (TEM) analysis was performed on the FEI Talos F200X. The produced gas was analysed in the gas chromatograph (Tianmi GC7900, TCD, 13X columns, N<sub>2</sub> as carrier). The ion chromatography (IC) was tested on a Thermo Fisher Aquion. The <sup>1</sup>H nuclear magnetic resonance (NMR) spectrum was acquired by BRUKER AVANCEIIIHD500. The elemental composition was determined by the inductively coupled plasma optical emission spectrometer (ICP-OES, Agilent 5110).

### **Electrocatalytic nitrate reduction tests**

The electrochemical measurements were carried on a CHI 660D in a H-typed electrolysis cell by a cation exchange membrane (Nafion 117) using a standard three-electrode setup. The saturated calomel electrode (SCE) and Pt foil were employed as the reference and counter electrodes, respectively. The K<sub>2</sub>SO<sub>4</sub> and KNO<sub>3</sub> were electrolyte and nitrogen source, respectively. Unless otherwise stated, all the potentials reported in this work were converted to reversible hydrogen electrode (RHE) scale via calibration with the following equation: ( $E_{RHE} = E_{SCE} + 0.059 \times \text{pH} + 0.242 \text{ V}$ ). The linear sweep voltammetry (LSV) curves were collected with a scan range from 0.654 to -0.845 V vs. RHE at a scan rate of 20 mV s<sup>-1</sup>. The condition of the stability test was that the electrode remained unchanged and the electrolyte was replaced at the end of each cycle. The amount of tert-butanol added in the trap experiment was 5 mL.

### **Electrochemical *in-situ* ATR-FTIR test**

The glassy carbon electrode supported by catalyst was used as the working electrode. 0.05 M K<sub>2</sub>SO<sub>4</sub> with 200 ppm NO<sub>3</sub><sup>-</sup>-N was adopted as the electrolyte. The *in-situ* ATR-FTIR spectra were collected during LSV test from 0.65 to -0.94 V vs. RHE with a scan rate of 2 mV/s. Each reflectance spectrum was collected with a time resolution of 60 s at a spectral resolution of 4 cm<sup>-1</sup>.

### Determination of $\text{NO}_3^-$ -N

First, a certain amount of electrolyte was removed from the electrolytic cell and diluted to 50 mL to the detection range. Subsequently, 1 mL 1 M HCl and 0.1 mL 0.8 wt%  $\text{H}_3\text{NO}_3\text{S}$  solution were added to the above solution. The absorbance was detected by UV-Vis spectrophotometry after 15 min at a wavelength of 220 nm and 275 nm. The final absorbance of  $\text{NO}_3^-$  can be calculated as following:  $A=A_{220 \text{ nm}} - 2A_{275 \text{ nm}}$ . The calibration curve can be acquired through different concentrations of  $\text{NaNO}_3$  solutions and corresponding absorbance. The fitting curve ( $y = 0.2516x - 0.0012$ ,  $R^2 = 0.9997$ ) exhibited great linear relation of absorbance value with  $\text{NO}_3^-$ -N concentration.

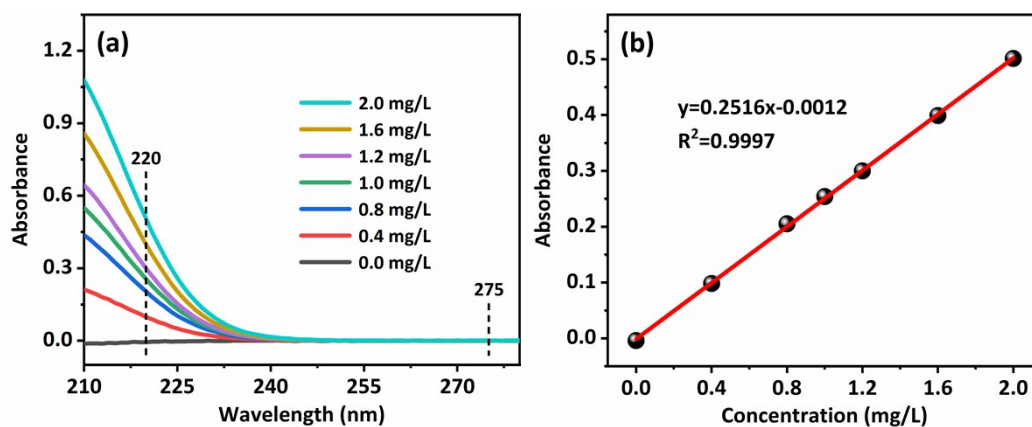

**Figure S 1.** (a) UV-Vis absorption curves of  $\text{NO}_3^-$ -N. (b) Calibration curve used to estimate the concentrations of  $\text{NO}_3^-$ -N.

### Determination of $\text{NO}_2^-$ -N

A mixture of p-aminobenzenesulfonamide (5 g), HCl (50 mL), and ultrapure water (450 mL) were used as a color reagent. A certain amount of electrolyte was removed from the electrolytic cell and diluted to 50 mL to the detection range. 1 mL mixed solution of p-aminobenzenesulfonamide and HCl and 1 mL N-(1-Naphthyl) ethylenediamine dihydrochloride (1 g/L) were added into the above solution and mixed uniformly. After standing at room temperature for 20 min, the absorbance was recorded at a wavelength of 540 nm. The concentration-absorbance curve was calibrated using the standard  $\text{NaNO}_2$  with different  $\text{NO}_2^-$ -N concentrations. The fitting curve ( $y = 3.12x + 0.0597$ ,  $R^2 = 0.9999$ ) exhibited great linear relation of absorbance value with  $\text{NO}_2^-$ -N concentration.

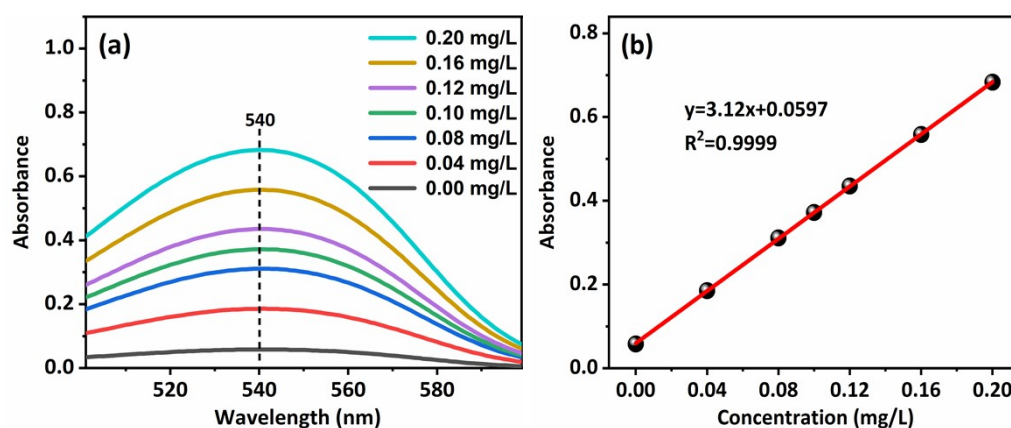

**Figure S 2.** (a) UV-Vis absorption curves of  $\text{NO}_2^-$ -N. (b) Calibration curve used to estimate the concentrations of  $\text{NO}_2^-$ -N.

### Determination of N<sub>2</sub>H<sub>4</sub>-N

The N<sub>2</sub>H<sub>4</sub> concentration was analyzed by Watt-Chrisp method. A mixture of C<sub>9</sub>H<sub>11</sub>NO (4.0 g), HCl (concentrated, 20.0 mL) and 95% ethanol (200 mL) was used as a color reagent. A certain amount of electrolyte was removed from the electrolytic cell and diluted to 25 mL to the detection range. 5 mL of color reagent were added into the above solution and mixed uniformly. After standing at room temperature for 20 min, the absorbance was recorded at a wavelength of 458 nm. The concentration absorbance curves were calibrated using a standard N<sub>2</sub>H<sub>4</sub>·H<sub>2</sub>O solution with a series of concentrations. The fitting curve ( $y = 1.6046x - 0.0682$ ,  $R^2 = 0.9993$ ) exhibited great linear relation of absorbance value with N<sub>2</sub>H<sub>4</sub> concentration.

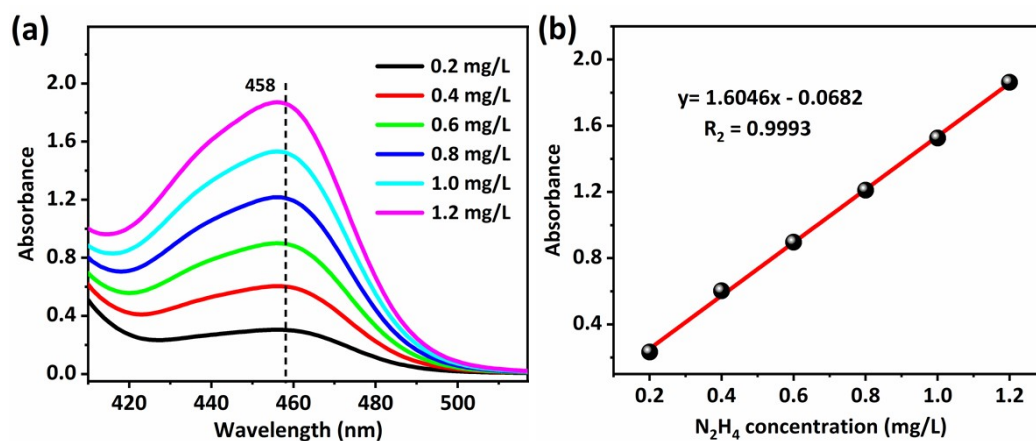

**Figure S 3.** (a) UV-Vis curves of various concentrations of N<sub>2</sub>H<sub>4</sub> stained with C<sub>9</sub>H<sub>11</sub>NO indicator. (b) A calibration curve used to estimate the concentrations of N<sub>2</sub>H<sub>4</sub>.

### Determination of $\text{NH}_3\text{-N}$ (Nessler's reagent)

The Nessler's reagent was employed as the color reagent for the determination of  $\text{NH}_3\text{-N}$ . Firstly, a certain amount of electrolyte was removed from the electrolytic cell and diluted to 50 mL to the detection range. Then, 1 mL of potassium sodium tartrate solution and 1 mL Nessler's reagent were subsequently added into the above solution and mixed uniformly. After standing at room temperature for 20 min, the absorbance was recorded at a wavelength of 420 nm. The concentration-absorbance curve was calibrated using the standard  $\text{NH}_4\text{Cl}$  with different  $\text{NH}_4^+\text{-N}$  concentrations. The fitting curve ( $y = 0.1753x + 0.0122$ ,  $R^2 = 0.999$ ) exhibited great linear relation of absorbance value with  $\text{NH}_4^+\text{-N}$  concentration.

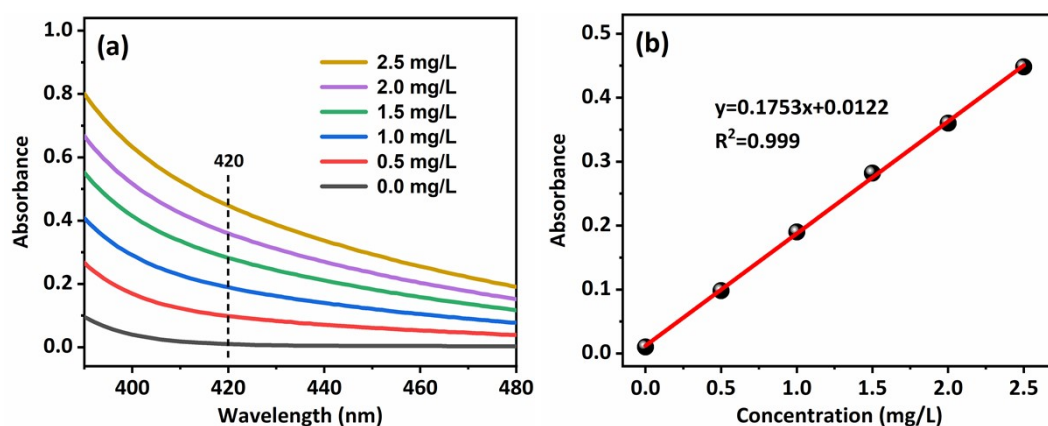

**Figure S 4.** (a) UV-Vis absorption curves of Nessler's reagent assays kept with different concentrations of  $\text{NH}_4^+\text{-N}$ . (b) Calibration curve used to estimate the concentrations of  $\text{NH}_4^+\text{-N}$ .



### Determination of NH<sub>3</sub>-N (Ion chromatography)

The standard curve was prepared by external standard method using NH<sub>4</sub>Cl as standard solution.

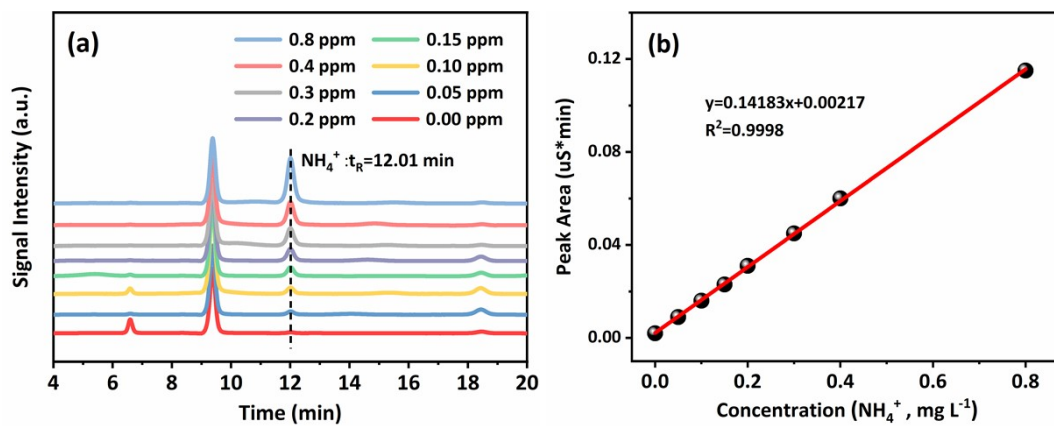

**Figure S 5.** The NH<sub>4</sub><sup>+</sup> detection of (a) standard spectra and (b) fitting curve by ion chromatography.

### Determination of H<sub>2</sub>

The standard curve was prepared by external standard method using high purity H<sub>2</sub> as standard gas ( $y = 496542x$ ,  $R^2 = 0.999$ ).

### Calculations of FE and NH<sub>3</sub> yield

$$FE = (8 \times F \times C_{NH_3} \times V) \div (M_{NH_3} \times Q) \times 100\%$$

$$NH_3 \text{ yield} = (C_{NH_3} \times V) \div (M_{NH_3} \times t \times S)$$

Where  $F$  is the Faradic constant ( $96485 \text{ C mol}^{-1}$ ),  $C_{NH_3}$  is the measured NH<sub>3</sub> concentration,  $V$  is the volume of electrolyte in the anode compartment (80 mL),  $M_{NH_3}$  is the molar mass of NH<sub>3</sub>,  $Q$  is the total quantity of applied electricity,  $t$  is the electrolysis time (1 h),  $S$  is the loaded area of catalyst ( $1 \text{ cm}^2$ ).

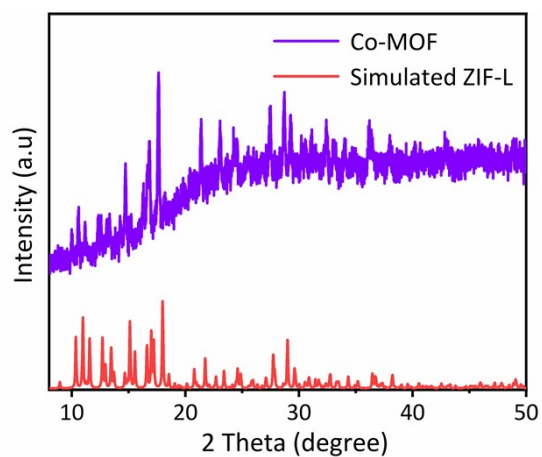

**Figure S 6.** The XRD patterns of the Co-MOF precursor. Simulated data of ZIF-L (Deposition Number: 1509273) from the Inorganic Crystal Structure Database (ICSD).

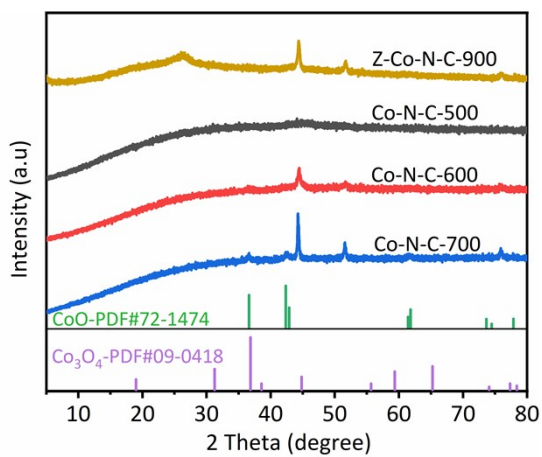

**Figure S 7.** The XRD patterns of the Co-N-C-500, Co-N-C-600, Co-N-C-700, and Z-Co-N-C-900.

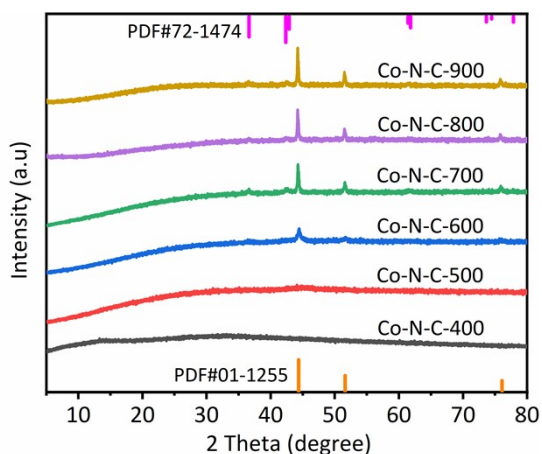

**Figure S 8.** The XRD patterns of the Co-N-C-400, Co-N-C-500, Co-N-C-600, Co-N-C-700, Co-N-C-800, and Co-N-C-900.

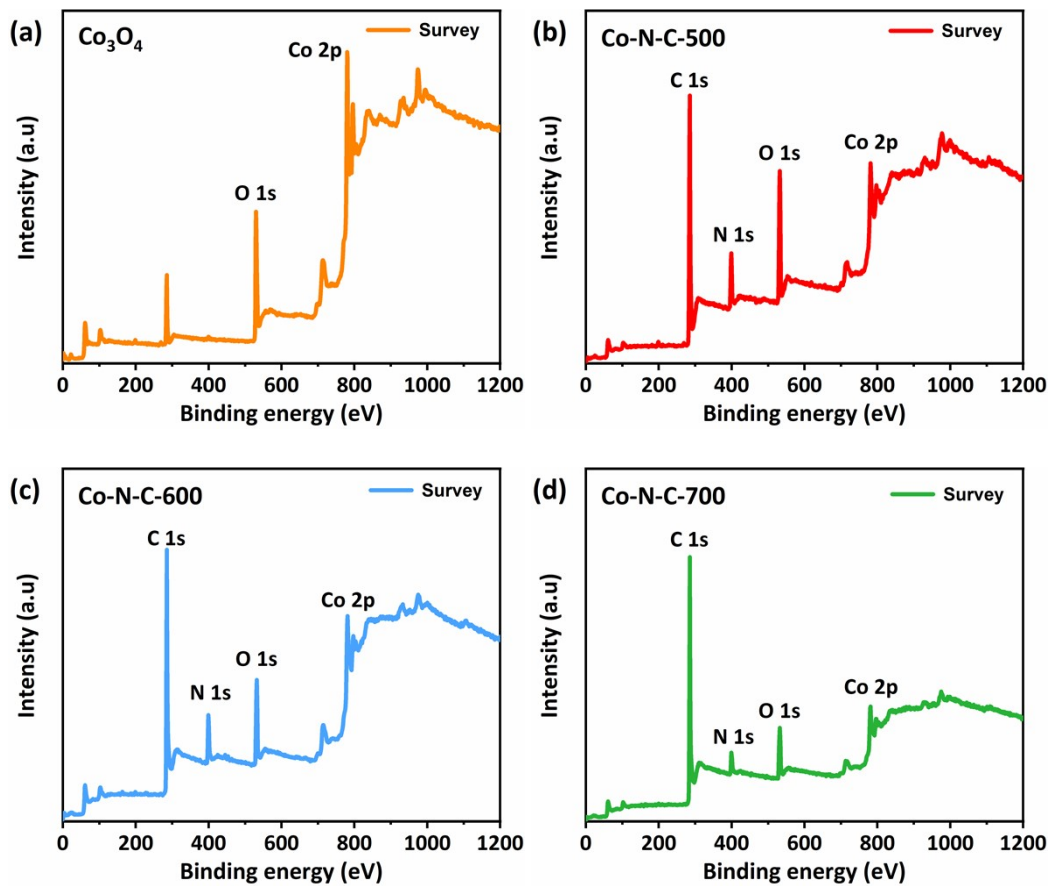

**Figure S 9.** XPS spectra survey scan of (a)  $\text{Co}_3\text{O}_4$ , (b) Co-N-C-500, (c) Co-N-C-600, and (d) Co-N-C-700.

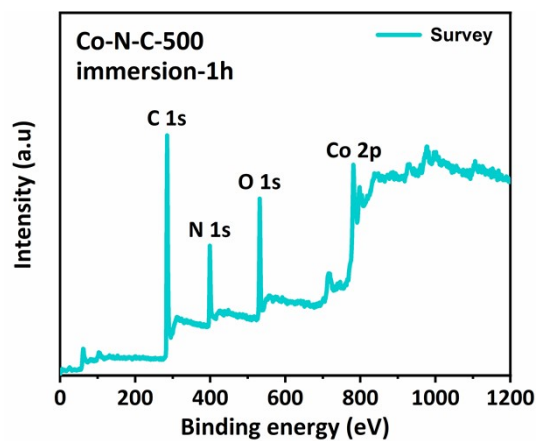

**Figure S 10.** XPS spectra survey scan of Co-N-C-500 after immersing

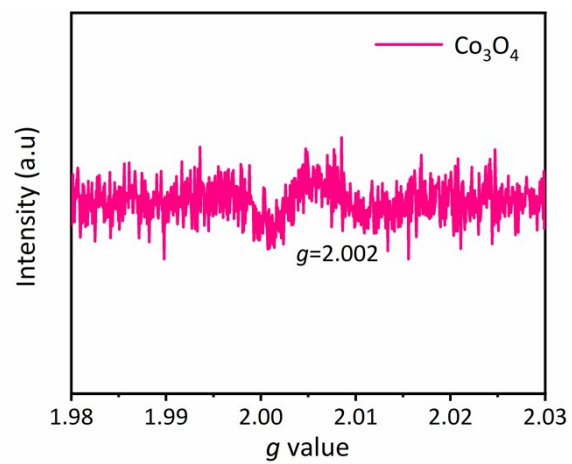

**Figure S 11.** EPR spectra of  $\text{Co}_3\text{O}_4$

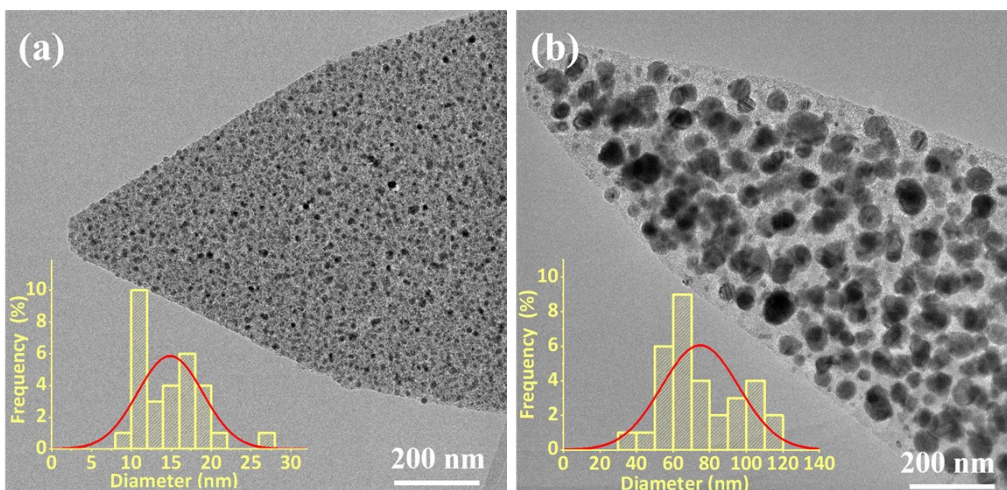

**Figure S 12.** (a) The TEM images and particle size distribution statistics (inset) of the Co-N-C-500. (b) The TEM images and particle size distribution statistics (inset) of the Co-N-C-700.

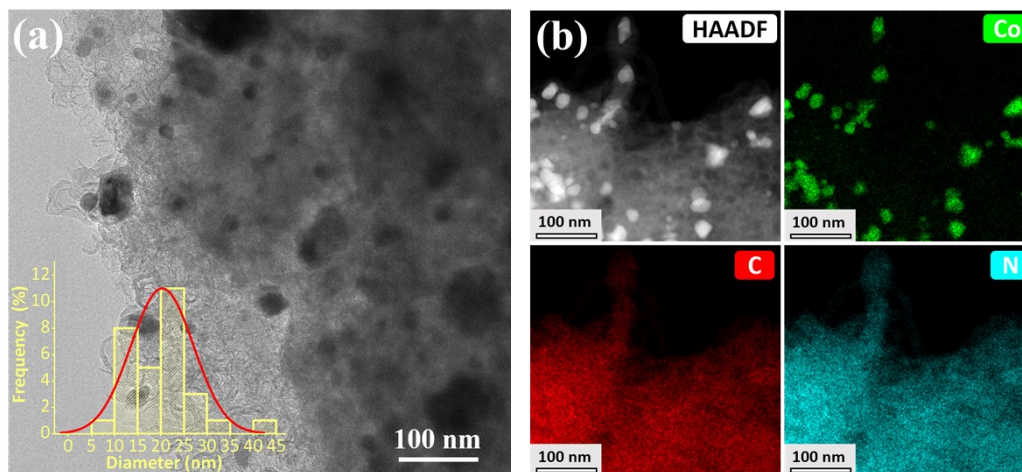

**Figure S 13.** (a) The TEM images and particle size distribution statistics (inset) of the Z-Co-N-C-900. (b) STEM and the element mapping images of Z-Co-N-C-900.

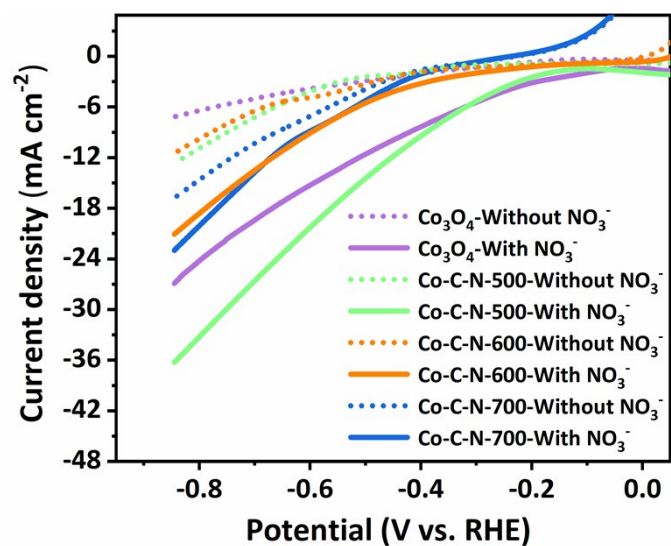

**Figure S 14.** LSV curves of Co<sub>3</sub>O<sub>4</sub>, Co-N-C-500, Co-N-C-600, and Co-N-C-700 with a scan rate of 20 mV/s in 0.05 M K<sub>2</sub>SO<sub>4</sub> with and without 0.05 M NO<sub>3</sub><sup>-</sup>.

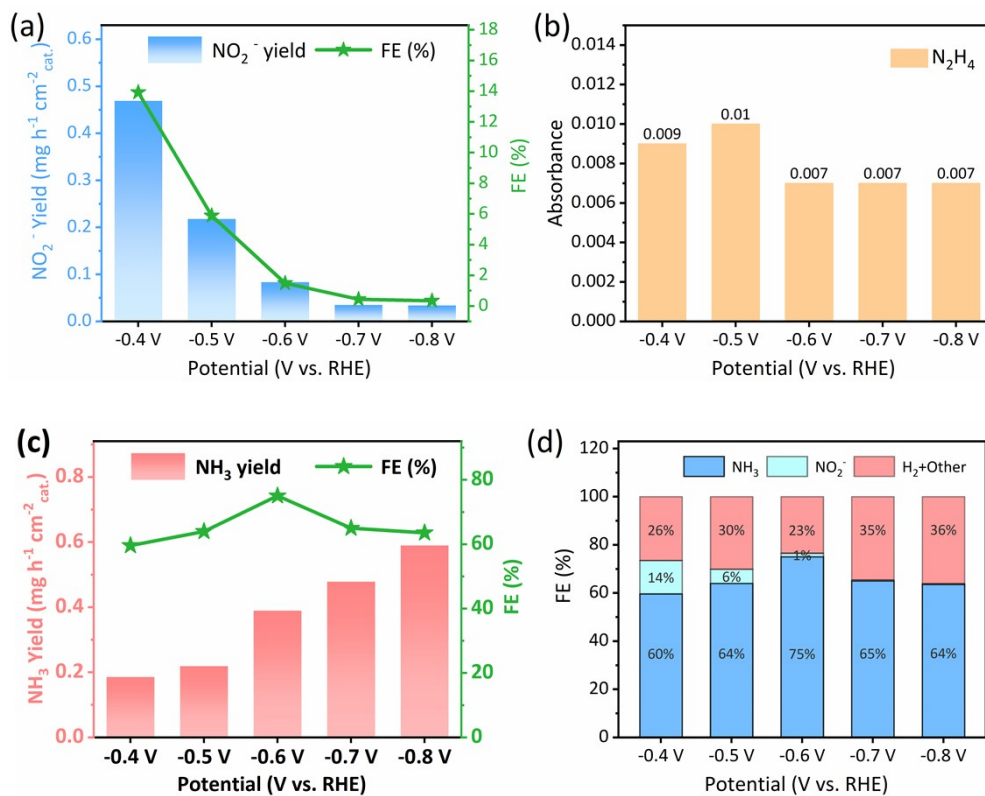

**Figure S 15.** (a) NO<sub>2</sub><sup>-</sup> yield rate and FE, (b) N<sub>2</sub>H<sub>4</sub> absorbance, (c) NH<sub>3</sub> yield rate and FE, and (d) FE of NH<sub>3</sub>, NO<sub>2</sub><sup>-</sup>, H<sub>2</sub>, and other by-products of Co-N-C-500 at various potentials in 0.05 M K<sub>2</sub>SO<sub>4</sub> with 0.01 M NO<sub>3</sub><sup>-</sup>.



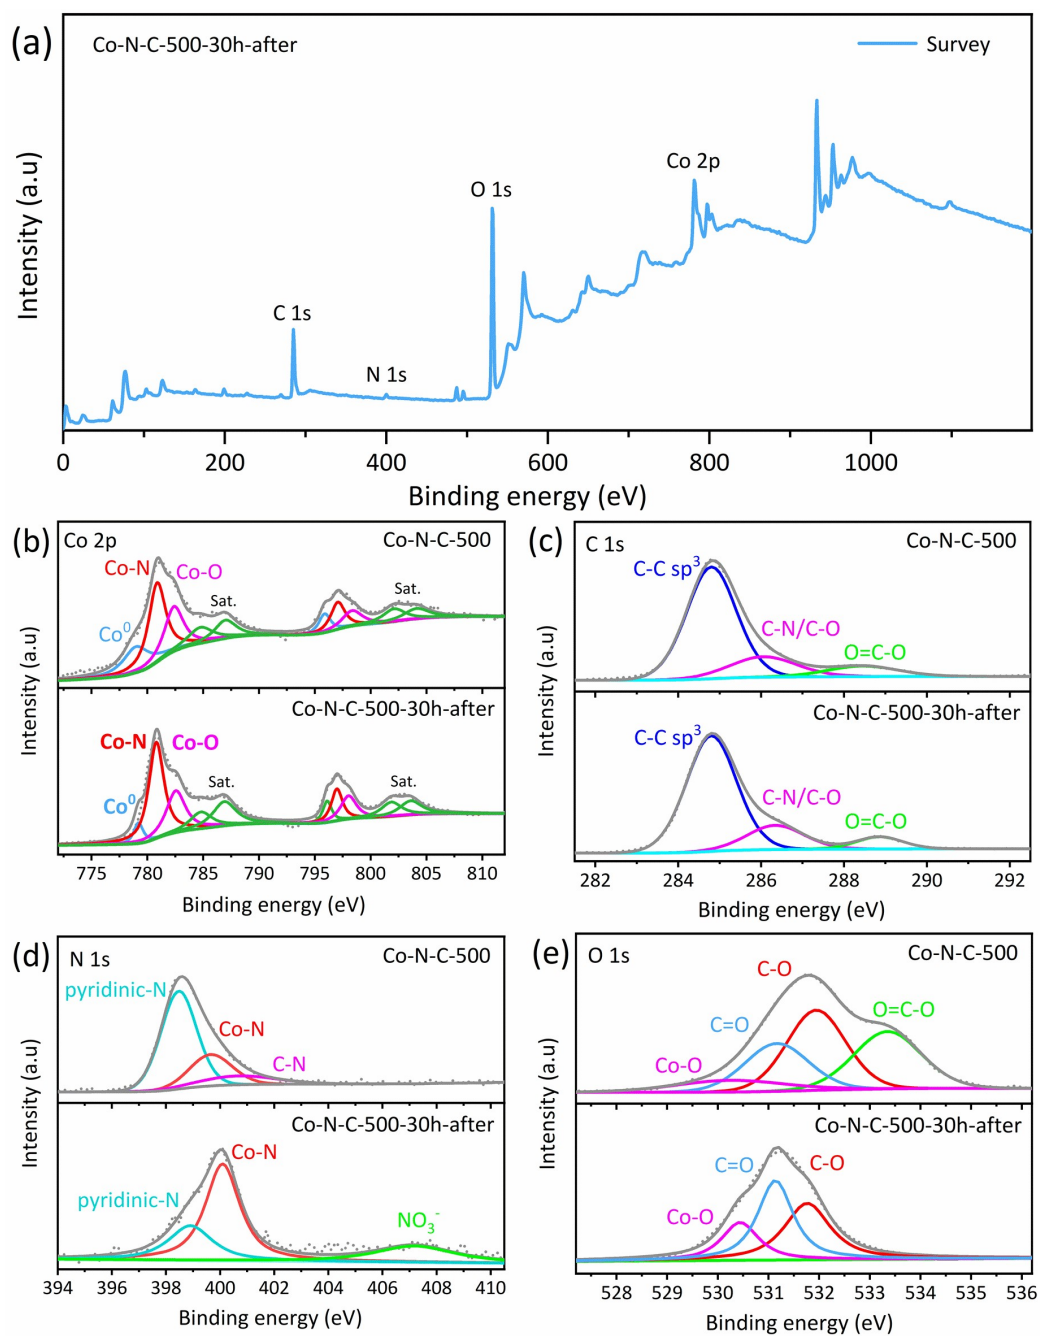

**Figure S 16.** XPS spectra survey scan of (a) Co-N-C-500-30h-after. The high-resolution XPS spectra of the Co-N-C-500 and Co-N-C-500-30h-after: (b) Co 2p, (c) C 1s, (d) N 1s, and (e) O 1s.

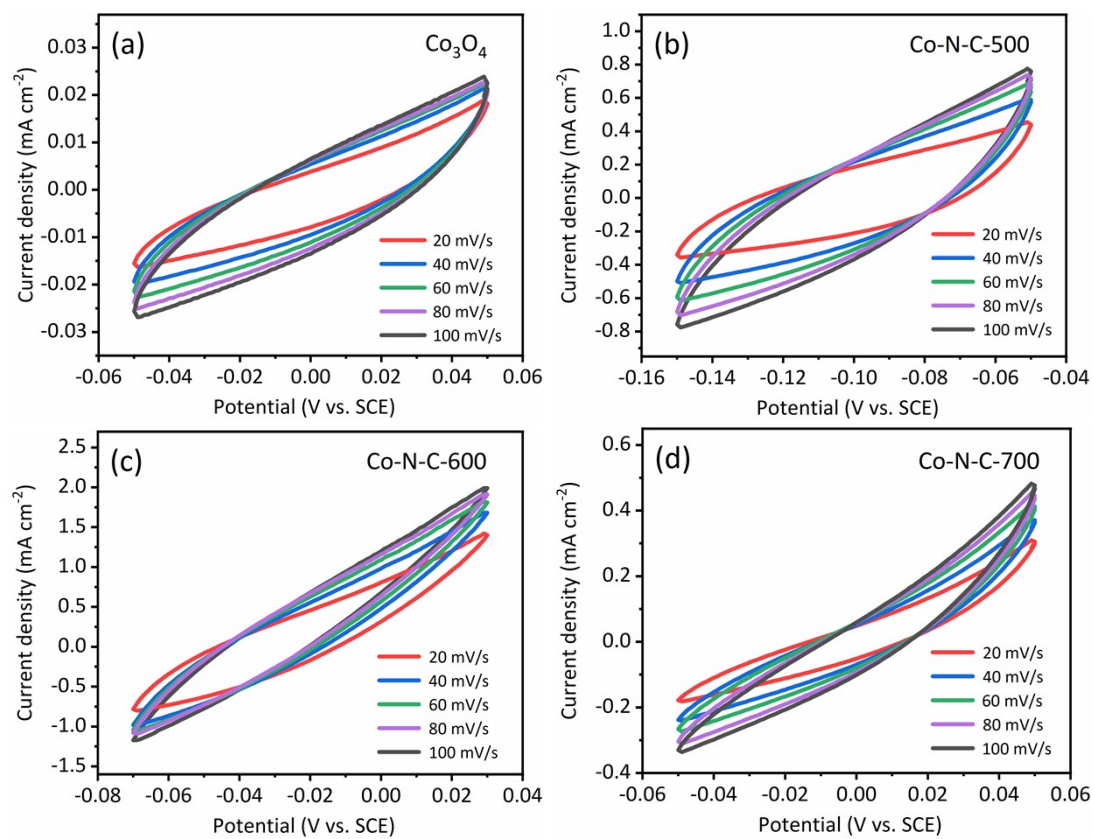

**Figure S 17.** CV curves of (a) Co<sub>3</sub>O<sub>4</sub>, (b) Co-N-C-500, (c) Co-N-C-600, and (d) Co-N-C-700.

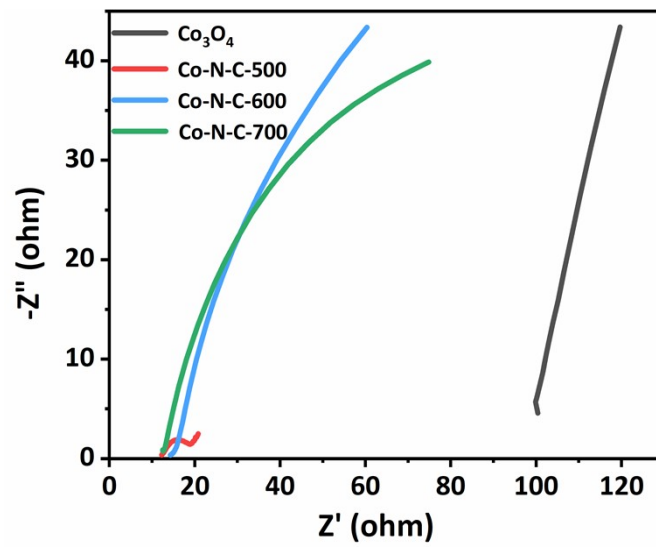

**Figure S 18.** Electrochemical impedance spectroscopy plot of the  $\text{Co}_3\text{O}_4$ , (b) Co-N-C-500, (c) Co-N-C-600, and Co-N-C-700

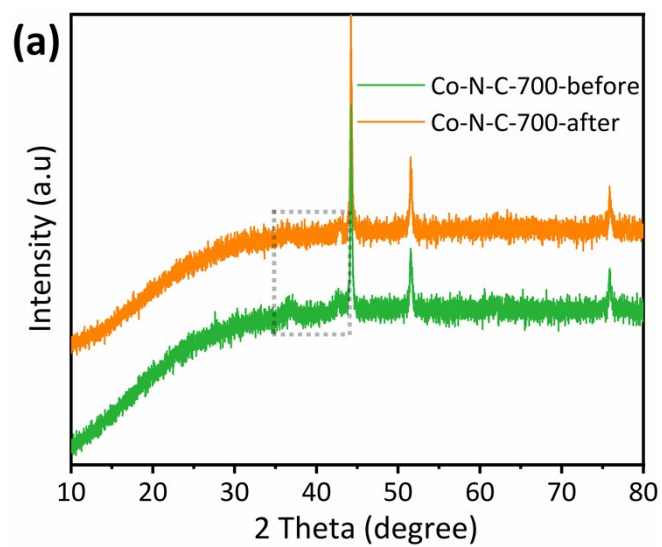

**Figure S 19. (a)** The XRD patterns of Co-N-C-700 and immersion-1h of Co-N-C-700.

The amount of catalyst used in the **Figure 6b** was 20 mg. The amount of catalyst used in the **Figure S19** was 50 mg.

**Table S 1.** The comparison of electrocatalytic NRA performance of Co-N-C-500 with other reported catalysts.

| Catalyst                            | Applied potential       | Electrolyte                                                                      | NH <sub>3</sub> yield                                      | FE (%)      | Ref.             |
|-------------------------------------|-------------------------|----------------------------------------------------------------------------------|------------------------------------------------------------|-------------|------------------|
| <b>Co-N-C-500</b>                   | <b>-0.8 V (vs. RHE)</b> | <b>0.05 M Na<sub>2</sub>SO<sub>4</sub>/0.1 M NO<sub>3</sub><sup>-</sup>-N</b>    | <b>2.8 mg h<sup>-1</sup> cm<sup>-2</sup></b>               | <b>86.8</b> | <b>This work</b> |
| Co-N-C                              | -0.6 V (vs. RHE)        | 0.05 M PBS/0.16 M KNO <sub>3</sub>                                               | 14 μmol h <sup>-1</sup> cm <sup>-2</sup>                   | 50          | 1                |
| Co-CN                               | -0.69 V (vs. RHE)       | 0.02 M Na <sub>2</sub> SO <sub>4</sub> /100 mg/L NO <sub>3</sub> <sup>-</sup> -N | 0.43 mg h <sup>-1</sup> cm <sup>-2</sup>                   | 87          | 2                |
| PP-Co                               | -0.6 V (vs. RHE)        | 0.1 M NaOH/0.1 M NO <sub>3</sub> <sup>-</sup>                                    | 1.1 mmol h <sup>-1</sup> mg <sub>cat.</sub> <sup>-1</sup>  | 90.1        | 3                |
| Co@CC                               | -0.8 V (vs. RHE)        | 0.1 M NaOH/0.1 M NO <sub>3</sub> <sup>-</sup>                                    | 0.6 mmol h <sup>-1</sup> mg <sub>cat.</sub> <sup>-1</sup>  | 93.4        | 4                |
| Ni@JBC-800                          | -0.5 V (vs. RHE)        | 0.1 M NaOH/0.1 M NO <sub>2</sub> <sup>-</sup>                                    | 4.12 mg h <sup>-1</sup> mg <sub>cat.</sub> <sup>-1</sup>   | 83.4        | 5                |
| Ni-N-C                              | -0.6 V (vs. RHE)        | 0.05 M PBS/0.16 M KNO <sub>3</sub>                                               | 0.74 mg h <sup>-1</sup> mg <sub>cat.</sub> <sup>-1</sup>   | 25          | 1                |
| Ni-NC                               | -0.70 V (vs. RHE)       | 0.5 M Na <sub>2</sub> SO <sub>4</sub> /100 mg/L NaNO <sub>3</sub>                | -                                                          | 15.2        | 6                |
| Cu/JDC/CP                           | -0.6 V (vs. RHE)        | 0.1 M NaOH/0.1 M NO <sub>2</sub> <sup>-</sup>                                    | 0.52 mmol h <sup>-1</sup> mg <sub>cat.</sub> <sup>-1</sup> | 93.2        | 7                |
| Cu/Ni-NC                            | -0.70 V (vs. RHE)       | 0.5 M Na <sub>2</sub> SO <sub>4</sub> /100 mg/L NaNO <sub>3</sub>                | 5.48 mg h <sup>-1</sup> cm <sup>-2</sup>                   | 97          | 6                |
| Cu(I)-N <sub>3</sub> C <sub>1</sub> | -0.64 V (vs. RHE)       | 0.05 M Na <sub>2</sub> SO <sub>4</sub> /500 mg/L NO <sub>3</sub> <sup>-</sup> -N | 80 μmol h <sup>-1</sup> mg <sub>cat.</sub> <sup>-1</sup>   | 94          | 8                |
| Cu-N-C SAC                          | -1.0 V (vs. RHE)        | 0.1 M KOH/0.1 M KNO <sub>3</sub>                                                 | 4.5 mg h <sup>-1</sup> cm <sup>-2</sup>                    | 84.7        | 9                |
| Cu-NC                               | -0.70 V (vs. RHE)       | 0.5 M Na <sub>2</sub> SO <sub>4</sub> /100 mg/L NaNO <sub>3</sub>                | -                                                          | 33.2        | 6                |
| Cu SAGs                             | -0.8 V (vs. RHE)        | 0.1 M PBS/20 mM NO <sub>3</sub> <sup>-</sup>                                     | 0.44 mg h <sup>-1</sup> cm <sup>-2</sup>                   | 78          | 10               |
| Cu-GS-800                           | -0.8 V (vs. RHE)        | 0.1 M K <sub>2</sub> SO <sub>4</sub> /0.1 M KNO <sub>3</sub>                     | 2.2 mg h <sup>-1</sup> mg <sub>cat.</sub> <sup>-1</sup>    | 59          | 11               |
| Fe SAC                              | -0.66 V (vs. RHE)       | 0.1 M K <sub>2</sub> SO <sub>4</sub> /0.5 M KNO <sub>3</sub>                     | 5.24 mg h <sup>-1</sup> mg <sub>cat.</sub> <sup>-1</sup>   | 75          | 12               |

|          |                   |                                                |                                          |    |    |
|----------|-------------------|------------------------------------------------|------------------------------------------|----|----|
| Fe-N-C   | -0.45 V (vs. RHE) | 0.05 M PBS/0.16 M NO <sub>3</sub> <sup>-</sup> | 10 μmol h <sup>-1</sup> cm <sup>-2</sup> | 82 | 13 |
| Mo-N-C   | -0.45 V (vs. RHE) | 0.05 M PBS/0.16 M NO <sub>3</sub> <sup>-</sup> | 5 μmol h <sup>-1</sup> cm <sup>-2</sup>  | 62 | 13 |
| FeMo-N-C | -0.45 V (vs. RHE) | 0.05 M PBS/0.16 M NO <sub>3</sub> <sup>-</sup> | 17 μmol h <sup>-1</sup> cm <sup>-2</sup> | 93 | 13 |

---

## References

1. E. Murphy, Y. Liu, I. Matanovic, M. Rüscher, Y. Huang, A. Ly, S. Guo, W. Zang, X. Yan, A. Martini, J. Timoshenko, B. R. Cuenya, I. V. Zenyuk, X. Pan, E. D. Spoecke and P. Atanassov, *Nature Communications*, 2023, **14**.
2. J. Li, M. Li, N. An, S. Zhang, Q. Song, Y. Yang, J. Li and X. Liu, *Proceedings of the National Academy of Sciences*, 2022, **119**.
3. Q. Chen, J. Liang, Q. Liu, K. Dong, L. Yue, P. Wei, Y. Luo, Q. Liu, N. Li, B. Tang, A. A. Alshehri, M. S. Hamdy, Z. Jiang and X. Sun, *Chem Commun (Camb)*, 2022, **58**, 4259-4262.
4. T. Xie, X. Li, J. Li, J. Chen, S. Sun, Y. Luo, Q. Liu, D. Zhao, C. Xu, L. Xie and X. Sun, *Inorg Chem*, 2022, **61**, 14195-14200.
5. X. Li, Z. Li, L. Zhang, D. Zhao, J. Li, S. Sun, L. Xie, Q. Liu, A. A. Alshehri, Y. Luo, Y. Liao, Q. Kong and X. Sun, *Nanoscale*, 2022, **14**, 13073-13077.
6. Y. Wang, H. Yin, F. Dong, X. Zhao, Y. Qu, L. Wang, Y. Peng, D. Wang, W. Fang and J. Li, *Small*, 2023, **19**.
7. L. Ouyang, L. Yue, Q. Liu, Q. Liu, Z. Li, S. Sun, Y. Luo, A. Ali Alshehri, M. S. Hamdy, Q. Kong and X. Sun, *J Colloid Interface Sci*, 2022, **624**, 394-399.
8. Y. Xue, Q. Yu, Q. Ma, Y. Chen, C. Zhang, W. Teng, J. Fan and W. X. Zhang, *Environ Sci Technol*, 2022, **56**, 14797-14807.
9. J. Yang, H. Qi, A. Li, X. Liu, X. Yang, S. Zhang, Q. Zhao, Q. Jiang, Y. Su, L. Zhang, J.-F. Li, Z.-Q. Tian, W. Liu, A. Wang and T. Zhang, *Journal of the American Chemical Society*, 2022, **144**, 12062-12071.
10. P. Li, R. Li, Y. Liu, M. Xie, Z. Jin and G. Yu, *Journal of the American Chemical Society*, 2023, **145**, 6471-6479.
11. J. Leverett, T. Tran-Phu, J. A. Yuwono, P. Kumar, C. Kim, Q. Zhai, C. Han, J. Qu, J. Cairney, A. N. Simonov, R. K. Hocking, L. Dai, R. Daiyan and R. Amal, *Advanced Energy Materials*, 2022, **12**.
12. Z. Y. Wu, M. Karamad, X. Yong, Q. Huang, D. A. Cullen, P. Zhu, C. Xia, Q. Xiao, M. Shakouri, F. Y. Chen, J. Y. T. Kim, Y. Xia, K. Heck, Y. Hu, M. S. Wong, Q. Li, I. Gates, S. Siahrostami and H. Wang, *Nat Commun*, 2021, **12**, 2870.
13. E. Murphy, Y. Liu, I. Matanovic, S. Guo, P. Tieu, Y. Huang, A. Ly, S. Das, I. Zenyuk, X. Pan, E. Spoecke and P. Atanassov, *ACS Catalysis*, 2022, **12**, 6651-6662.
